# Supplementary material for: Replacement of Glycoprotein B in Alcelaphine Herpesvirus 1 by Its Ovine Herpesvirus 2 Homolog : Implications in Vaccine Development for Sheep-Associated Malignant Catarrhal Fever
Source: PubMed Central journal article supplement (PMC4973634; doi:10.1128/msphere.00108-16), 2016-08-03
Supplement: sph004162124sf2.pdf [file sph004162124sf2.pdf]

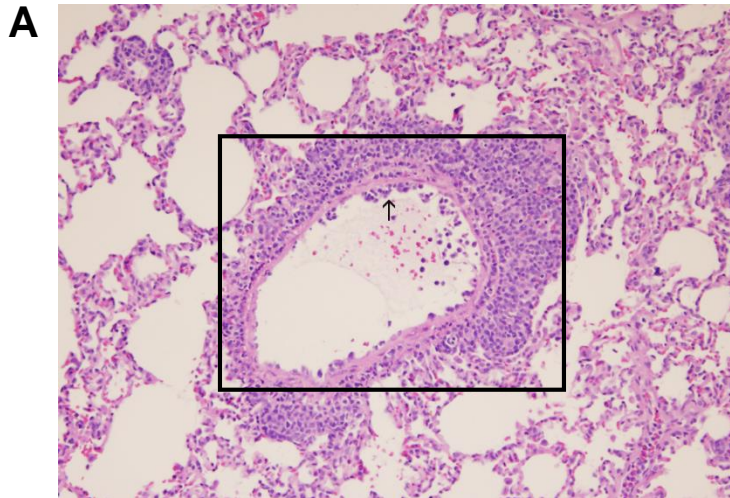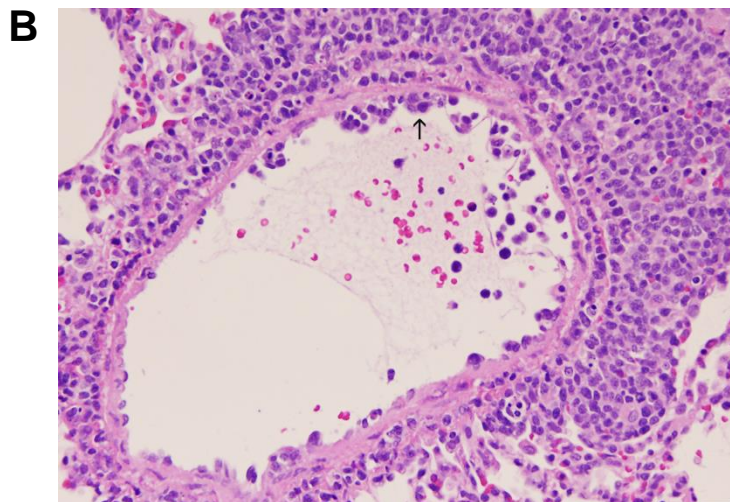

Fig. S2. Typical AIHV-1-induced lymphoproliferation in lung, associated with a vein exhibiting endophlebitis (arrow). This histopathological lesion is representative of all rabbits infected with the wild-type AIHV-1. Image A was taken at 100X. Image B is a magnification of the squared area of image A.
